# Supplementary material for: Highly selective enrichment of phosphopeptides using aluminum silicate
Source: Royal Society of Chemistry journal article supplement (doi:10.1039/c4ay01918k), 2014-01-01
Supplement: c4ay01918k1.pdf [file c4ay01918k1.pdf]

Tree hierar Calc. MH+ Meas. Mr Calc. Mr Dev.(Da) Score MascotScc Sequence

F:\Identified saliva phosphopeptides\MSMS\_1155\0\_M2\0\1155.6000.LIFT.LIFT\ast\pdata\1\1r

Ce\_saliva\_DHB2\_msms1155

DHB

Statherin OS=Homo sapiens GN=STATH PE=1 SV=2 STAT\_HUMAN

Digest Matches (Score: 38.57)

Search Parameter: Charge=1+, MS Tol.:250.000000 ppm, MSMS Tol.:1.000000 Da, semiTrypsin, Mascot 2.4.1, SwissProt SwissProt\_2013\_09.fasta

Modifications: Global: Carboxymethyl (C), Optional: Oxidation (M), Phospho (ST),

MSMS 1 1155,448 1154,593 1154,441 0,152 4 38 SSEEKFLR 1: Phospho (ST) 2: Phospho (ST)

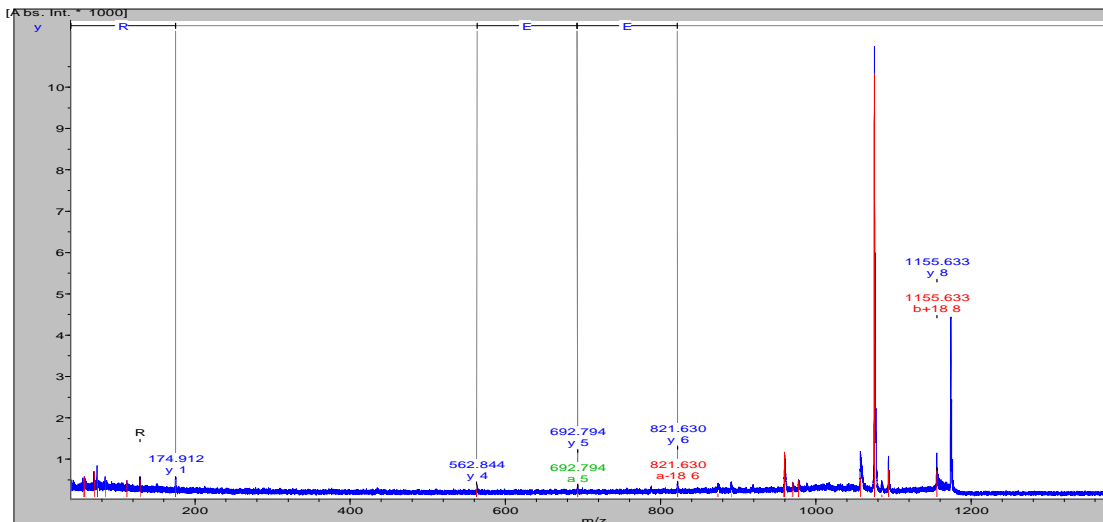

|      | S  | S  | E | E | K | F | L | R | Ser     | Ser     | Glu     | Glu     | Lys     | Phe     | Leu      | Arg      |
|------|----|----|---|---|---|---|---|---|---------|---------|---------|---------|---------|---------|----------|----------|
| Ion  | 1  | 2  | 3 | 4 | 5 | 6 | 7 | 8 | 1       | 2       | 3       | 4       | 5       | 6       | 7        | 8        |
| a    | S* | S* | E | E | K | F | L | R | 140.011 | 307.009 | 436.052 | 565.094 | 693.189 | 840.258 | 953.342  | 1109.443 |
| a-17 | S* | S* | E | E | K | F | L | R | 122.984 | 289.983 | 419.025 | 548.068 | 676.163 | 823.231 | 936.315  | 1092.416 |
| a-18 | S* | S* | E | E | K | F | L | R | 122.000 | 288.999 | 418.041 | 547.084 | 675.179 | 822.247 | 935.331  | 1091.432 |
| b    | S* | S* | E | E | K | F | L | R | 168.006 | 335.004 | 464.047 | 593.089 | 721.184 | 868.253 | 981.337  | 1137.438 |
| b-17 | S* | S* | E | E | K | F | L | R | 150.979 | 317.977 | 447.020 | 576.063 | 704.158 | 851.226 | 964.310  | 1120.411 |
| b-18 | S* | S* | E | E | K | F | L | R | 149.995 | 316.993 | 446.036 | 575.079 | 703.174 | 850.242 | 963.326  | 1119.427 |
| b+18 | S* | S* | E | E | K | F | L | R | 186.016 | 353.015 | 482.057 | 611.100 | 739.195 | 886.263 | 999.347  | 1155.448 |
| c    | S* | S* | E | E | K | F | L | R | 185.032 | 352.031 | 481.073 | 610.116 | 738.211 | 885.279 | 998.363  | 1154.464 |
| x    | S* | S* | E | E | K | F | L | R | 201.098 | 314.182 | 461.251 | 589.346 | 718.388 | 847.431 | 1014.429 | 1181.428 |
| y    | S* | S* | E | E | K | F | L | R | 175.119 | 288.203 | 435.271 | 563.366 | 692.409 | 821.452 | 988.450  | 1155.448 |
| z    | S* | S* | E | E | K | F | L | R | 158.092 | 271.176 | 418.245 | 546.340 | 675.382 | 804.425 | 971.423  | 1138.422 |
| i    | S* | S* | E | E | K | F | L | R | 140.011 | 140.010 | 102.054 | 102.054 | 101.107 | 120.080 | 86.096   | 129.113  |
|      | 8  | 7  | 6 | 5 | 4 | 3 | 2 | 1 | Arg     | Leu     | Phe     | Lys     | Glu     | Glu     | Ser      | Ser      |

Tree hierar Calc. MH+ Meas. Mr Calc. Mr Dev.(Da) Score MascotScc Sequence

F:\Identified saliva phosphopeptides\1270.5000.LIFT1SRRef\data\1\1r

Lift1270

Lift1270

Statherin OS=Homo sapiens GN=STATH PE=1 SV=2 STAT\_HUMAN

Digest Matches (Score: 65.32)

Search Parameter: Charge=1+, MS Tol.:250.000000 ppm, MSMS Tol.:1.000000 Da, semiTrypsin, Mascot 2.4.1, SwissProt SwissProt\_2013\_09.fasta

Modifications: Global: Carboxymethyl (C), Optional: Oxidation (M), Phospho (ST),

MSMS 1 1270,475 1269,493 1269,468 0,025 516 65 DSSEKFLR 2: Phospho (ST) 3: Phospho (ST)

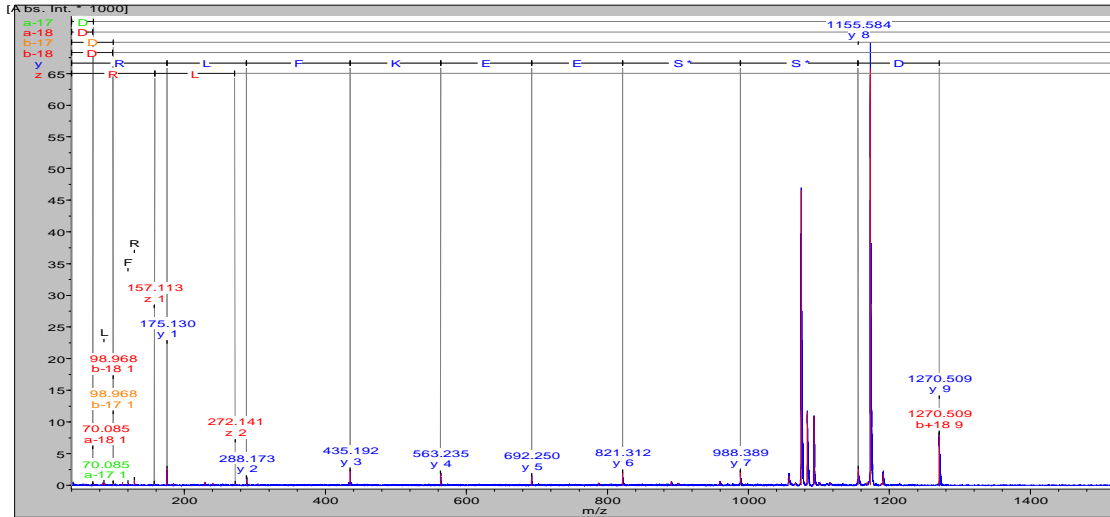

|      | D | S  | S  | E | E | K | F | L | R | Asp     | Ser     | Ser     | Glu     | Glu     | Lys     | Phe      | Leu      | Arg      |
|------|---|----|----|---|---|---|---|---|---|---------|---------|---------|---------|---------|---------|----------|----------|----------|
| Ion  | 1 | 2  | 3  | 4 | 5 | 6 | 7 | 8 | 9 | 1       | 2       | 3       | 4       | 5       | 6       | 7        | 8        | 9        |
| a    | D | S* | S* | E | E | K | F | L | R | 88.039  | 255.038 | 422.036 | 551.079 | 680.121 | 808.216 | 955.285  | 1068.369 | 1224.470 |
| a-17 | D | S* | S* | E | E | K | F | L | R | 71.013  | 238.011 | 405.009 | 534.052 | 663.095 | 791.190 | 938.258  | 1051.342 | 1207.443 |
| a-18 | D | S* | S* | E | E | K | F | L | R | 70.029  | 237.027 | 404.025 | 533.068 | 662.111 | 790.206 | 937.274  | 1050.358 | 1206.459 |
| b    | D | S* | S* | E | E | K | F | L | R | 116.034 | 283.033 | 450.031 | 579.074 | 708.116 | 836.211 | 983.279  | 1096.364 | 1252.465 |
| b-17 | D | S* | S* | E | E | K | F | L | R | 99.008  | 266.006 | 433.004 | 562.047 | 691.090 | 819.185 | 966.253  | 1079.337 | 1235.438 |
| b-18 | D | S* | S* | E | E | K | F | L | R | 98.024  | 265.022 | 432.020 | 561.063 | 690.106 | 818.201 | 965.269  | 1078.353 | 1234.454 |
| b+18 | D | S* | S* | E | E | K | F | L | R | 134.045 | 301.043 | 468.042 | 597.084 | 726.127 | 854.222 | 1001.290 | 1114.374 | 1270.475 |
| c    | D | S* | S* | E | E | K | F | L | R | 133.061 | 300.059 | 467.057 | 596.100 | 725.143 | 853.238 | 1000.306 | 1113.390 | 1269.491 |
| x    | D | S* | S* | E | E | K | F | L | R | 201.098 | 314.182 | 461.251 | 589.346 | 718.388 | 847.431 | 1014.429 | 1181.428 | 1296.455 |
| y    | D | S* | S* | E | E | K | F | L | R | 175.119 | 288.203 | 435.271 | 563.366 | 692.409 | 821.452 | 988.450  | 1155.448 | 1270.475 |
| z    | D | S* | S* | E | E | K | F | L | R | 158.092 | 271.176 | 418.245 | 546.340 | 675.382 | 804.425 | 971.423  | 1138.422 | 1253.449 |
| i    | D | S* | S* | E | E | K | F | L | R | 88.039  | 140.010 | 140.010 | 102.054 | 102.054 | 101.107 | 120.080  | 86.096   | 129.113  |
|      | 9 | 8  | 7  | 6 | 5 | 4 | 3 | 2 | 1 | Arg     | Leu     | Phe     | Lys     | Glu     | Glu     | Ser      | Ser      | Asp      |

Tree hierar Calc. MH+ Meas. Mr Calc. Mr Dev.(Da) Score MascotSco Sequence

F:\Identified saliva phosphopeptides\MSMS\_1404\1SRefpdata\1\1r

Lift1404

Lift1404

Salivary acidic proline-rich phosphoprotein 1/2 OS=Homo sapiens GN=PRH1 PE=1 SV=2 PRPC\_HUMAN

Digest Matches (Score: 71.08)

Search Parameter: Charge=1+, MS Tol.:250.000000 ppm, MSMS Tol.:1.000000 Da, semiTrypsin, Mascot 2.4.1, SwissProt SwissProt\_2013\_09.fasta

Modifications: Global: Carboxymethyl (C), Optional: Oxidation (M), Phospho (ST),

MSMS 1 1404,531 1403,593 1403,524 0,069 21 71 GDSEQFIDEER 3: Phospho (ST)

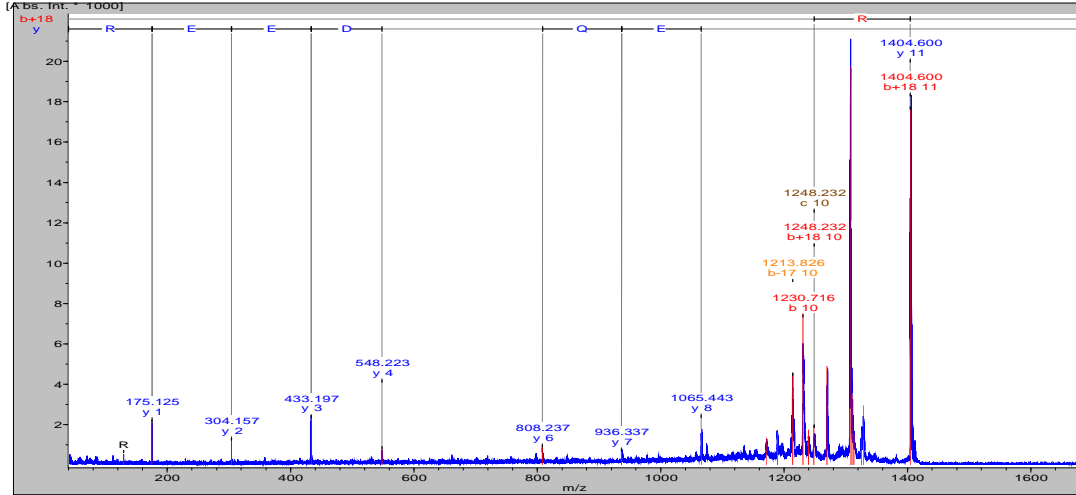

|      | G  | D  | S  | E | Q | F | I | D | E | E  | R  | Gly     | Asp     | Ser     | Glu     | Gln     | Phe     | Ile     | Asp      | Glu      |
|------|----|----|----|---|---|---|---|---|---|----|----|---------|---------|---------|---------|---------|---------|---------|----------|----------|
| Ion  | 1  | 2  | 3  | 4 | 5 | 6 | 7 | 8 | 9 | 10 | 11 | 1       | 2       | 3       | 4       | 5       | 6       | 7       | 8        | 9        |
| a    | G  | D  | S* | E | Q | F | I | D | E | E  | R  | 30.034  | 145.061 | 312.059 | 441.102 | 569.160 | 716.229 | 829.313 | 944.340  | 1073.382 |
| a-17 | G  | D  | S* | E | Q | F | I | D | E | E  | R  | 13.007  | 128.034 | 295.033 | 424.075 | 552.134 | 699.202 | 812.286 | 927.313  | 1056.356 |
| a-18 | G  | D  | S* | E | Q | F | I | D | E | E  | R  | 12.023  | 127.050 | 294.049 | 423.091 | 551.150 | 698.218 | 811.302 | 926.329  | 1055.372 |
| b    | G  | D  | S* | E | Q | F | I | D | E | E  | R  | 58.029  | 173.056 | 340.054 | 469.097 | 597.155 | 744.224 | 857.308 | 972.335  | 1101.377 |
| b-17 | G  | D  | S* | E | Q | F | I | D | E | E  | R  | 41.002  | 156.029 | 323.027 | 452.070 | 580.129 | 727.197 | 840.281 | 955.308  | 1084.351 |
| b-18 | G  | D  | S* | E | Q | F | I | D | E | E  | R  | 40.018  | 155.045 | 322.043 | 451.086 | 579.145 | 726.213 | 839.297 | 954.324  | 1083.367 |
| b+18 | G  | D  | S* | E | Q | F | I | D | E | E  | R  | 76.039  | 191.066 | 358.065 | 487.107 | 615.166 | 762.234 | 875.318 | 990.345  | 1119.388 |
| c    | G  | D  | S* | E | Q | F | I | D | E | E  | R  | 75.055  | 190.082 | 357.081 | 486.123 | 614.182 | 761.250 | 874.334 | 989.361  | 1118.404 |
| x    | G  | D  | S* | E | Q | F | I | D | E | E  | R  | 201.098 | 330.141 | 459.183 | 574.210 | 687.294 | 834.363 | 962.421 | 1091.464 | 1258.462 |
| y    | G  | D  | S* | E | Q | F | I | D | E | E  | R  | 175.119 | 304.162 | 433.204 | 548.231 | 661.315 | 808.384 | 936.442 | 1065.485 | 1232.483 |
| z    | G  | D  | S* | E | Q | F | I | D | E | E  | R  | 158.092 | 287.135 | 416.178 | 531.205 | 644.289 | 791.357 | 919.416 | 1048.458 | 1215.457 |
| i    | G  | D  | S* | E | Q | F | I | D | E | E  | R  | 30.034  | 88.039  | 140.010 | 102.054 | 101.070 | 120.080 | 86.096  | 88.039   | 102.054  |
|      | 11 | 10 | 9  | 8 | 7 | 6 | 5 | 4 | 3 | 2  | 1  | Arg     | Glu     | Glu     | Asp     | Ile     | Phe     | Gln     | Glu      | Ser      |

Tree hierar Calc. MH+ Meas. Mr Calc. Mr Dev.(Da) Score MascotScc Sequence

F:\Identified saliva phosphopeptides\1426.6000.LIFT1SRef\data\1\1r

Lift1426

Lift1426

Statherin OS=Homo sapiens GN=STATH PE=1 SV=2 STAT\_HUMAN

Digest Matches (Score: 40.19)

Search Parameter: Charge=1+, MS Tol.:250.000000 ppm, MSMS Tol.:1.000000 Da, semiTrypsin, Mascot 2.4.1, SwissProt SwissProt\_2013\_09.fasta

Modifications: Global: Carboxymethyl (C), Optional: Oxidation (M), Phospho (ST),

MSMS 1 1426,576 1425,593 1425,569 0,024 130 40 DSSEKFLRR 2: Phospho (ST) 3: Phospho (ST)

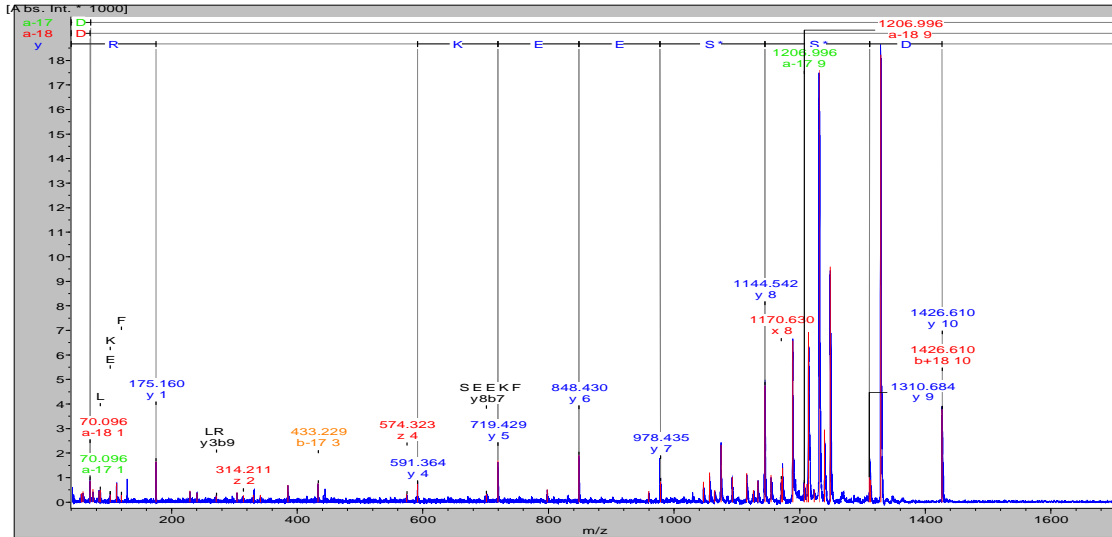

|      | D  | S  | S  | E | E | K | F | L | R | R  | Asp     | Ser     | Ser     | Glu     | Glu     | Lys     | Phe      | Leu      | Arg      |
|------|----|----|----|---|---|---|---|---|---|----|---------|---------|---------|---------|---------|---------|----------|----------|----------|
| Ion  | 1  | 2  | 3  | 4 | 5 | 6 | 7 | 8 | 9 | 10 | 1       | 2       | 3       | 4       | 5       | 6       | 7        | 8        | 9        |
| a    | D  | S* | S* | E | E | K | F | L | R | R  | 88.039  | 255.038 | 422.036 | 551.079 | 680.121 | 808.216 | 955.285  | 1068.369 | 1224.470 |
| a-17 | D  | S* | S* | E | E | K | F | L | R | R  | 71.013  | 238.011 | 405.009 | 534.052 | 663.095 | 791.190 | 938.258  | 1051.342 | 1207.443 |
| a-18 | D  | S* | S* | E | E | K | F | L | R | R  | 70.029  | 237.027 | 404.025 | 533.068 | 662.111 | 790.206 | 937.274  | 1050.358 | 1206.459 |
| b    | D  | S* | S* | E | E | K | F | L | R | R  | 116.034 | 283.033 | 450.031 | 579.074 | 708.116 | 836.211 | 983.279  | 1096.364 | 1252.465 |
| b-17 | D  | S* | S* | E | E | K | F | L | R | R  | 99.008  | 266.006 | 433.004 | 562.047 | 691.090 | 819.185 | 966.253  | 1079.337 | 1235.438 |
| b-18 | D  | S* | S* | E | E | K | F | L | R | R  | 98.024  | 265.022 | 432.020 | 561.063 | 690.106 | 818.201 | 965.269  | 1078.353 | 1234.454 |
| b+18 | D  | S* | S* | E | E | K | F | L | R | R  | 134.045 | 301.043 | 468.042 | 597.084 | 726.127 | 854.222 | 1001.290 | 1114.374 | 1270.475 |
| c    | D  | S* | S* | E | E | K | F | L | R | R  | 133.061 | 300.059 | 467.057 | 596.100 | 725.143 | 853.238 | 1000.306 | 1113.390 | 1269.491 |
| x    | D  | S* | S* | E | E | K | F | L | R | R  | 201.098 | 357.199 | 470.283 | 617.352 | 745.447 | 874.489 | 1003.532 | 1170.530 | 1337.529 |
| y    | D  | S* | S* | E | E | K | F | L | R | R  | 175.119 | 331.220 | 444.304 | 591.373 | 719.468 | 848.510 | 977.553  | 1144.551 | 1311.549 |
| z    | D  | S* | S* | E | E | K | F | L | R | R  | 158.092 | 314.194 | 427.278 | 574.346 | 702.441 | 831.484 | 960.526  | 1127.524 | 1294.523 |
| i    | D  | S* | S* | E | E | K | F | L | R | R  | 88.039  | 140.010 | 140.010 | 102.054 | 102.054 | 101.107 | 120.080  | 86.096   | 129.113  |
|      | 10 | 9  | 8  | 7 | 6 | 5 | 4 | 3 | 2 | 1  | Arg     | Arg     | Leu     | Phe     | Lys     | Glu     | Glu      | Ser      | Ser      |

Tree hierar Calc. MH+ Meas. Mr Calc. Mr Dev.(Da) Score MascotScc Sequence

F:\Identified saliva phosphopeptides\MSMS\_1461\0\_C5\1\1461.8000.LIFT\1SRef\pdata\1\1r

MSMS\_1461

MSMS\_1461

Salivary acidic proline-rich phosphoprotein 1/2 OS=Homo sapiens GN=PRH1 PE=1 SV=2 PRPC\_HUMAN

Digest Matches (Score: 28.29)

Search Parameter: Charge=1+, MS Tol.:250.000000 ppm, MSMS Tol.:1.000000 Da, semiTrypsin, Mascot 2.4.1, SwissProt SwissProt\_2013\_09.fasta

Modifications: Global: Carboxymethyl (C), Optional: Oxidation (M), Phospho (ST),

MSMS 1 1461,553 1460,793 1460,546 0,247 267 28 GGDSEQFIDEER 4: Phospho (ST)

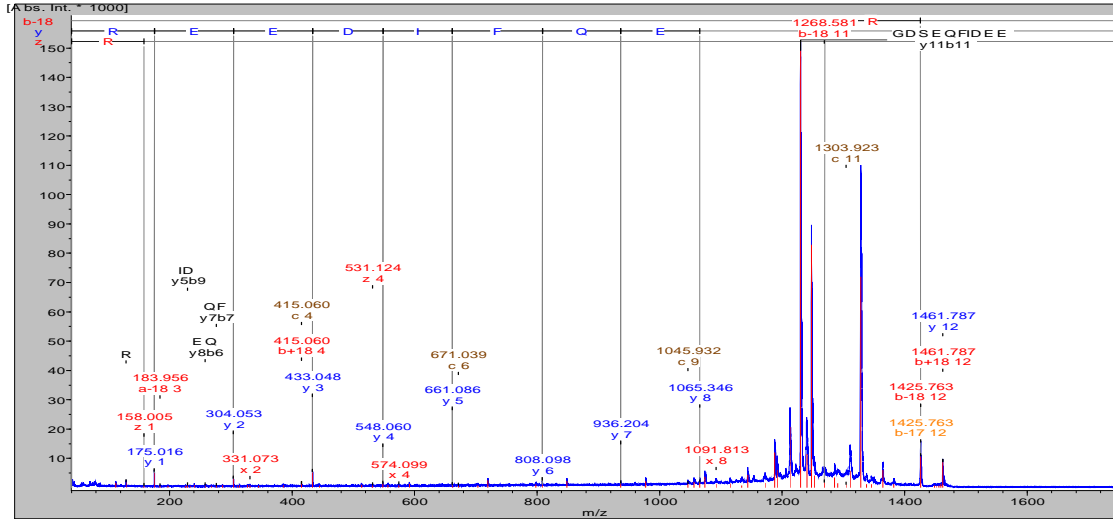

|      | G  | G  | D  | S  | E | Q | F | I | D | E  | E  | R  | Gly     | Gly     | Asp     | Ser     | Glu     | Gln     | Phe     | Ile      | Asp      |
|------|----|----|----|----|---|---|---|---|---|----|----|----|---------|---------|---------|---------|---------|---------|---------|----------|----------|
| Ion  | 1  | 2  | 3  | 4  | 5 | 6 | 7 | 8 | 9 | 10 | 11 | 12 | 1       | 2       | 3       | 4       | 5       | 6       | 7       | 8        | 9        |
| a    | G  | G  | D  | S* | E | Q | F | I | D | E  | E  | R  | 30.034  | 87.055  | 202.082 | 369.081 | 498.123 | 626.182 | 773.250 | 886.334  | 1001.361 |
| a-17 | G  | G  | D  | S* | E | Q | F | I | D | E  | E  | R  | 13.007  | 70.029  | 185.056 | 352.054 | 481.097 | 609.155 | 756.224 | 869.308  | 984.335  |
| a-18 | G  | G  | D  | S* | E | Q | F | I | D | E  | E  | R  | 12.023  | 69.045  | 184.072 | 351.070 | 480.113 | 608.171 | 755.240 | 868.324  | 983.351  |
| b    | G  | G  | D  | S* | E | Q | F | I | D | E  | E  | R  | 58.029  | 115.050 | 230.077 | 397.076 | 526.118 | 654.177 | 801.245 | 914.329  | 1029.356 |
| b-17 | G  | G  | D  | S* | E | Q | F | I | D | E  | E  | R  | 41.002  | 98.024  | 213.051 | 380.049 | 509.092 | 637.150 | 784.219 | 897.303  | 1012.330 |
| b-18 | G  | G  | D  | S* | E | Q | F | I | D | E  | E  | R  | 40.018  | 97.040  | 212.067 | 379.065 | 508.108 | 636.166 | 783.235 | 896.319  | 1011.346 |
| b+18 | G  | G  | D  | S* | E | Q | F | I | D | E  | E  | R  | 76.039  | 133.061 | 248.088 | 415.086 | 544.129 | 672.187 | 819.256 | 932.340  | 1047.367 |
| c    | G  | G  | D  | S* | E | Q | F | I | D | E  | E  | R  | 75.055  | 132.077 | 247.104 | 414.102 | 543.145 | 671.203 | 818.272 | 931.356  | 1046.383 |
| x    | G  | G  | D  | S* | E | Q | F | I | D | E  | E  | R  | 201.098 | 330.141 | 459.183 | 574.210 | 687.294 | 834.363 | 962.421 | 1091.464 | 1258.462 |
| y    | G  | G  | D  | S* | E | Q | F | I | D | E  | E  | R  | 175.119 | 304.162 | 433.204 | 548.231 | 661.315 | 808.384 | 936.442 | 1065.485 | 1232.483 |
| z    | G  | G  | D  | S* | E | Q | F | I | D | E  | E  | R  | 158.092 | 287.135 | 416.178 | 531.205 | 644.289 | 791.357 | 919.416 | 1048.458 | 1215.457 |
| i    | G  | G  | D  | S* | E | Q | F | I | D | E  | E  | R  | 30.034  | 30.033  | 88.039  | 140.010 | 102.054 | 101.070 | 120.080 | 86.096   | 88.039   |
|      | 12 | 11 | 10 | 9  | 8 | 7 | 6 | 5 | 4 | 3  | 2  | 1  | Arg     | Glu     | Glu     | Asp     | Ile     | Phe     | Gln     | Glu      | Ser      |

Tree hierar Calc. MH+ Meas. Mr Calc. Mr Dev.(Da) Score MascotScc Sequence

F:\Identified saliva phosphopeptides\MSMS\_1576A\0\_M13\1\1576.7400.LIFT\1SRef\data\1\1r

MSMS\_1576A

DHB

Salivary acidic proline-rich phosphoprotein 1/2 OS=Homo sapiens GN=PRH1 PE=1 SV=2 PRPC\_HUMAN

Digest Matches (Score: 71.84)

Search Parameter: Charge=1+, MS Tol.:250.000000 ppm, MSMS Tol.:1.000000 Da, semiTrypsin, Mascot 2.4.1, SwissProt SwissProt\_2013\_09.fasta

Modifications: Global: Carboxymethyl (C), Optional: Oxidation (M), Phospho (ST),

MSMS 1 1576.58 1575.733 1575.573 0,16 520 71 DGGDSEQFIDEER 5: Phospho (ST)

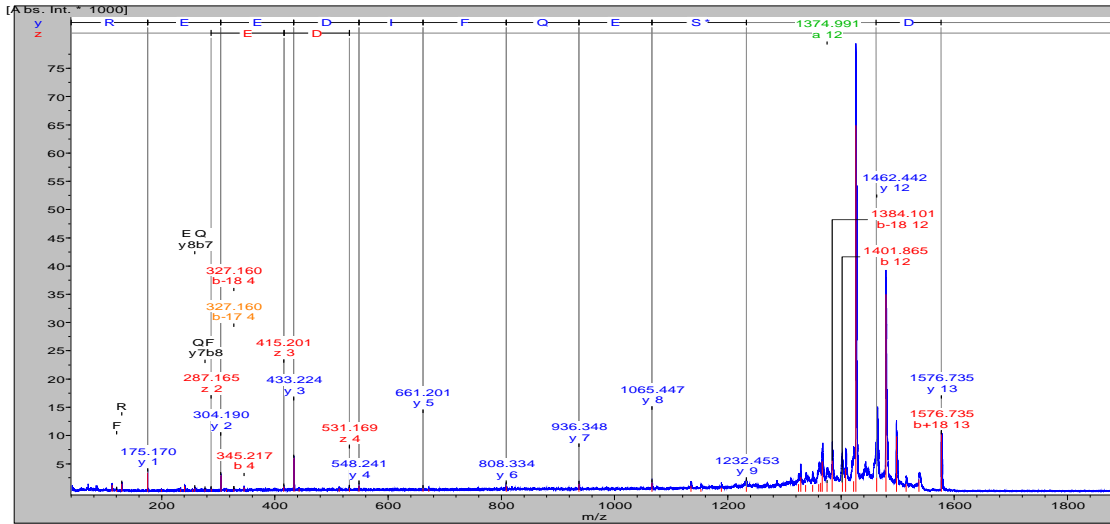

|      | D  | G  | G  | D  | S | E | Q | F | I | D  | E  | E  | R  | Asp     | Gly     | Gly     | Asp     | Ser     | Glu     | Gln     | Phe      | Ile      |
|------|----|----|----|----|---|---|---|---|---|----|----|----|----|---------|---------|---------|---------|---------|---------|---------|----------|----------|
| Ion  | 1  | 2  | 3  | 4  | 5 | 6 | 7 | 8 | 9 | 10 | 11 | 12 | 13 | 1       | 2       | 3       | 4       | 5       | 6       | 7       | 8        | 9        |
| a    | D  | G  | G  | D  | S | E | Q | F | I | D  | E  | E  | R  | 88.039  | 145.061 | 202.082 | 317.109 | 484.108 | 613.150 | 741.209 | 888.277  | 1001.361 |
| a-17 | D  | G  | G  | D  | S | E | Q | F | I | D  | E  | E  | R  | 71.013  | 128.034 | 185.056 | 300.083 | 467.081 | 596.124 | 724.182 | 871.251  | 984.335  |
| a-18 | D  | G  | G  | D  | S | E | Q | F | I | D  | E  | E  | R  | 70.029  | 127.050 | 184.072 | 299.099 | 466.097 | 595.140 | 723.198 | 870.267  | 983.351  |
| b    | D  | G  | G  | D  | S | E | Q | F | I | D  | E  | E  | R  | 116.034 | 173.056 | 230.077 | 345.104 | 512.102 | 641.145 | 769.204 | 916.272  | 1029.356 |
| b-17 | D  | G  | G  | D  | S | E | Q | F | I | D  | E  | E  | R  | 99.008  | 156.029 | 213.051 | 328.078 | 495.076 | 624.118 | 752.177 | 899.245  | 1012.330 |
| b-18 | D  | G  | G  | D  | S | E | Q | F | I | D  | E  | E  | R  | 98.024  | 155.045 | 212.067 | 327.094 | 494.092 | 623.134 | 751.193 | 898.261  | 1011.346 |
| b+18 | D  | G  | G  | D  | S | E | Q | F | I | D  | E  | E  | R  | 134.045 | 191.066 | 248.088 | 363.115 | 530.113 | 659.156 | 787.214 | 934.283  | 1047.367 |
| c    | D  | G  | G  | D  | S | E | Q | F | I | D  | E  | E  | R  | 133.061 | 190.082 | 247.104 | 362.131 | 529.129 | 658.172 | 786.230 | 933.299  | 1046.383 |
| x    | D  | G  | G  | D  | S | E | Q | F | I | D  | E  | E  | R  | 201.098 | 330.141 | 459.183 | 574.210 | 687.294 | 834.363 | 962.421 | 1091.464 | 1258.462 |
| y    | D  | G  | G  | D  | S | E | Q | F | I | D  | E  | E  | R  | 175.119 | 304.162 | 433.204 | 548.231 | 661.315 | 808.384 | 936.442 | 1065.485 | 1232.483 |
| z    | D  | G  | G  | D  | S | E | Q | F | I | D  | E  | E  | R  | 158.092 | 287.135 | 416.178 | 531.205 | 644.289 | 791.357 | 919.416 | 1048.458 | 1215.457 |
| i    | D  | G  | G  | D  | S | E | Q | F | I | D  | E  | E  | R  | 88.039  | 30.033  | 30.033  | 88.039  | 140.010 | 102.054 | 101.070 | 120.080  | 86.096   |
|      | 13 | 12 | 11 | 10 | 9 | 8 | 7 | 6 | 5 | 4  | 3  | 2  | 1  | Arg     | Glu     | Glu     | Asp     | Ile     | Phe     | Gln     | Glu      | Ser      |

Tree hierar Calc. MH+ Meas. Mr Calc. Mr Dev.(Da) Score MascotScc Sequence

F:\Identified saliva phosphopeptides\MSMS\_2454\0\_M14\1\2454.0000.LIFT\1SRef\data\1\1r  
 MSMS\_2454  
 MSMS\_2454

Basic salivary proline-rich protein 4 OS=Homo sapiens GN=PRB4 PE=1 SV=3 PRB4\_HUMAN

Digest Matches (Score: 59.53)

Search Parameter: Charge=1+, MS Tol.:250.000000 ppm, MSMS Tol.:1.000000 Da, semiTrypsin, Mascot 2.4.1, SwissProt SwissProt\_2013\_09.fasta  
 Modifications: Global: Carboxymethyl (C), Optional: Oxidation (M), Phospho (ST),  
 MSMS 1 2454,047 2452,993 2453,04 -0,047 39 62 SSEDVSEQEESLFLISGKPEGR 1: Phospho (ST) 6: Phospho (ST)

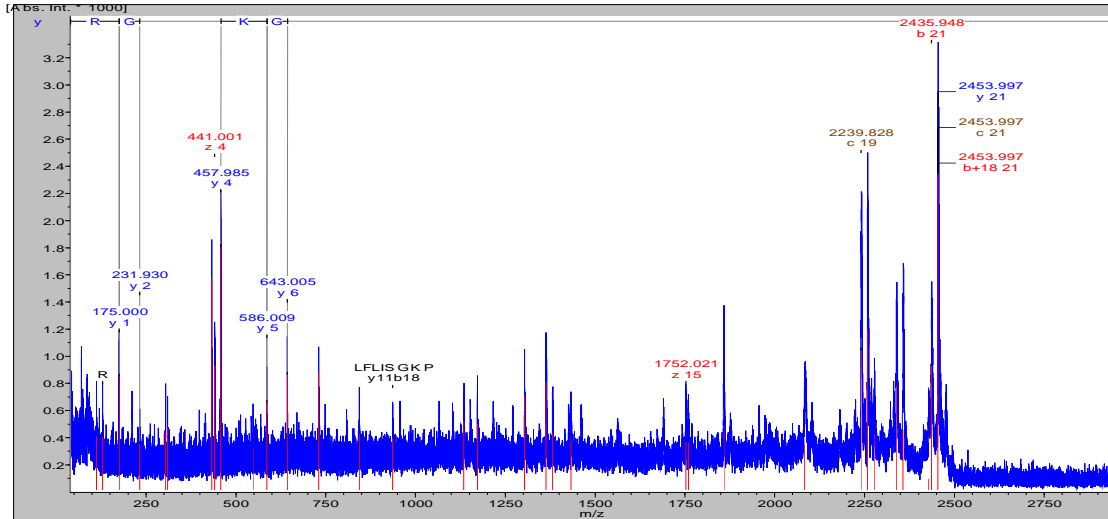

|      | S  | S  | E  | D  | V  | S  | Q  | E  | E  | S  | L  | F  | L  | I  | S  | G  | K  | P  | E  | G  | R  | Ser     | Ser     | Glu     | Asp     | Val     | Ser     | Gln     |
|------|----|----|----|----|----|----|----|----|----|----|----|----|----|----|----|----|----|----|----|----|----|---------|---------|---------|---------|---------|---------|---------|
| Ion  | 1  | 2  | 3  | 4  | 5  | 6  | 7  | 8  | 9  | 10 | 11 | 12 | 13 | 14 | 15 | 16 | 17 | 18 | 19 | 20 | 21 | 1       | 2       | 3       | 4       | 5       | 6       | 7       |
| a    | S* | S  | E  | D  | V  | S  | Q  | E  | E  | S  | L  | F  | L  | I  | S* | G  | K  | P  | E  | G  | R  | 140.011 | 227.043 | 356.085 | 471.112 | 570.181 | 657.213 | 785.271 |
| a-17 | S* | S  | E  | D  | V  | S  | Q  | E  | E  | S  | L  | F  | L  | I  | S* | G  | K  | P  | E  | G  | R  | 122.984 | 210.016 | 339.059 | 454.086 | 553.154 | 640.186 | 768.245 |
| a-18 | S* | S  | E  | D  | V  | S  | Q  | E  | E  | S  | L  | F  | L  | I  | S* | G  | K  | P  | E  | G  | R  | 122.000 | 209.032 | 338.075 | 453.102 | 552.170 | 639.202 | 767.261 |
| b    | S* | S  | E  | D  | V  | S  | Q  | E  | E  | S  | L  | F  | L  | I  | S* | G  | K  | P  | E  | G  | R  | 168.006 | 255.038 | 384.080 | 499.107 | 598.176 | 685.208 | 813.266 |
| b-17 | S* | S  | E  | D  | V  | S  | Q  | E  | E  | S  | L  | F  | L  | I  | S* | G  | K  | P  | E  | G  | R  | 150.979 | 238.011 | 367.054 | 482.081 | 581.149 | 668.181 | 796.240 |
| b-18 | S* | S  | E  | D  | V  | S  | Q  | E  | E  | S  | L  | F  | L  | I  | S* | G  | K  | P  | E  | G  | R  | 149.995 | 237.027 | 366.070 | 481.097 | 580.165 | 667.197 | 795.256 |
| b+18 | S* | S  | E  | D  | V  | S  | Q  | E  | E  | S  | L  | F  | L  | I  | S* | G  | K  | P  | E  | G  | R  | 186.016 | 273.048 | 402.091 | 517.118 | 616.186 | 703.218 | 831.277 |
| c    | S* | S  | E  | D  | V  | S  | Q  | E  | E  | S  | L  | F  | L  | I  | S* | G  | K  | P  | E  | G  | R  | 185.032 | 272.064 | 401.107 | 516.134 | 615.202 | 702.234 | 830.293 |
| x    | S* | S  | E  | D  | V  | S  | Q  | E  | E  | S  | L  | F  | L  | I  | S* | G  | K  | P  | E  | G  | R  | 201.098 | 258.120 | 387.162 | 484.215 | 612.310 | 669.331 | 836.330 |
| y    | S* | S  | E  | D  | V  | S  | Q  | E  | E  | S  | L  | F  | L  | I  | S* | G  | K  | P  | E  | G  | R  | 175.119 | 232.140 | 361.183 | 458.236 | 586.331 | 643.352 | 810.351 |
| z    | S* | S  | E  | D  | V  | S  | Q  | E  | E  | S  | L  | F  | L  | I  | S* | G  | K  | P  | E  | G  | R  | 158.092 | 215.114 | 344.156 | 441.209 | 569.304 | 626.326 | 793.324 |
| i    | S* | S  | E  | D  | V  | S  | Q  | E  | E  | S  | L  | F  | L  | I  | S* | G  | K  | P  | E  | G  | R  | 140.011 | 60.044  | 102.054 | 88.039  | 72.080  | 60.044  | 101.070 |
|      | 21 | 20 | 19 | 18 | 17 | 16 | 15 | 14 | 13 | 12 | 11 | 10 | 9  | 8  | 7  | 6  | 5  | 4  | 3  | 2  | 1  | Arg     | Gly     | Glu     | Pro     | Lys     | Gly     | Ser     |

Tree hierar Calc. MH+ Meas. Mr Calc. Mr Dev.(Da) Score MascotScc Sequence

F:\Identified saliva phosphopeptides\MSMS2534.LIFT\fastpdata1\1r

MSMS2534

dhb

Basic salivary proline-rich protein 3 OS=Homo sapiens GN=PRB3 PE=1 SV=3 PRB4\_HUMAN

Digest Matches (Score: 31.06)

Search Parameter: Charge=1+, MS Tol.:250.000000 ppm, MSMS Tol.:1.000000 Da, semiTrypsin, Mascot 2.4.1, SwissProt SwissProt\_2013\_09.fasta

Modifications: Global: Carboxymethyl (C), Optional: Oxidation (M), Phospho (ST),

MSMS 1 2534,014 2533,593 2533,006 0,586 8 34 QSLNEDVSEQEESPSVISGKPEGR 1: Phospho (ST) 2: Phospho (ST) 6: Phospho (ST)

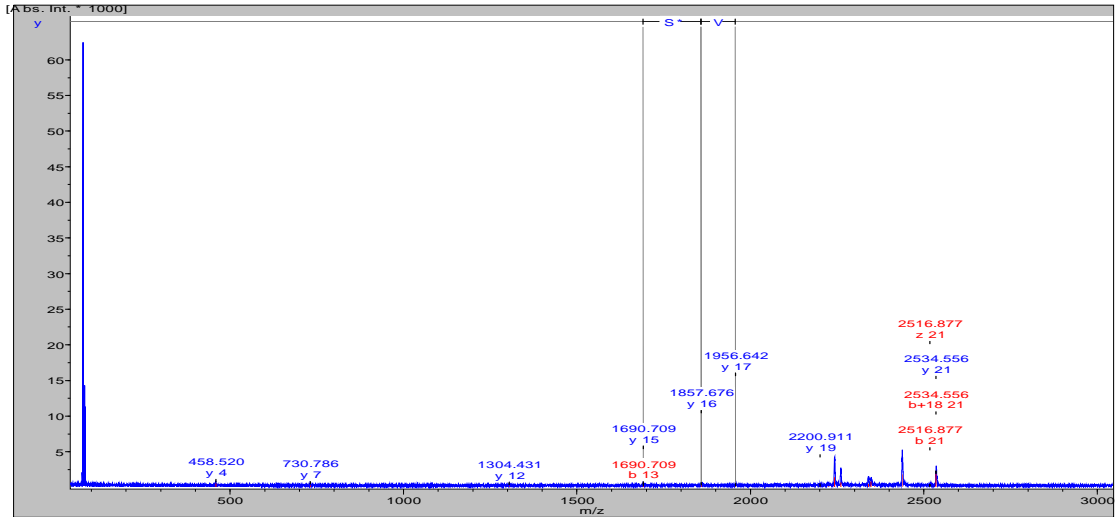

|      | S  | S  | E  | D  | V  | S  | Q  | E  | E  | S  | L  | F  | L  | I  | S  | G  | K  | P  | E  | G  | R  | Ser     | Ser     | Glu     | Asp     | Val     | Ser     | Gln     |
|------|----|----|----|----|----|----|----|----|----|----|----|----|----|----|----|----|----|----|----|----|----|---------|---------|---------|---------|---------|---------|---------|
| ln   | 1  | 2  | 3  | 4  | 5  | 6  | 7  | 8  | 9  | 10 | 11 | 12 | 13 | 14 | 15 | 16 | 17 | 18 | 19 | 20 | 21 | 1       | 2       | 3       | 4       | 5       | 6       | 7       |
| a    | S* | S* | E  | D  | V  | S* | Q  | E  | E  | S  | L  | F  | L  | I  | S  | G  | K  | P  | E  | G  | R  | 140.011 | 307.009 | 436.052 | 551.079 | 650.147 | 817.145 | 945.204 |
| a-17 | S* | S* | E  | D  | V  | S* | Q  | E  | E  | S  | L  | F  | L  | I  | S  | G  | K  | P  | E  | G  | R  | 122.984 | 289.983 | 419.025 | 534.052 | 633.120 | 800.119 | 928.177 |
| a-18 | S* | S* | E  | D  | V  | S* | Q  | E  | E  | S  | L  | F  | L  | I  | S  | G  | K  | P  | E  | G  | R  | 122.000 | 288.999 | 418.041 | 533.068 | 632.136 | 799.135 | 927.193 |
| b    | S* | S* | E  | D  | V  | S* | Q  | E  | E  | S  | L  | F  | L  | I  | S  | G  | K  | P  | E  | G  | R  | 168.006 | 335.004 | 464.047 | 579.074 | 678.142 | 845.140 | 973.199 |
| b-17 | S* | S* | E  | D  | V  | S* | Q  | E  | E  | S  | L  | F  | L  | I  | S  | G  | K  | P  | E  | G  | R  | 150.979 | 317.977 | 447.020 | 562.047 | 661.115 | 828.114 | 956.172 |
| b-18 | S* | S* | E  | D  | V  | S* | Q  | E  | E  | S  | L  | F  | L  | I  | S  | G  | K  | P  | E  | G  | R  | 149.995 | 316.993 | 446.036 | 561.063 | 660.131 | 827.130 | 955.188 |
| b+18 | S* | S* | E  | D  | V  | S* | Q  | E  | E  | S  | L  | F  | L  | I  | S  | G  | K  | P  | E  | G  | R  | 186.016 | 353.015 | 482.057 | 597.084 | 696.153 | 863.151 | 991.209 |
| c    | S* | S* | E  | D  | V  | S* | Q  | E  | E  | S  | L  | F  | L  | I  | S  | G  | K  | P  | E  | G  | R  | 185.032 | 352.031 | 481.073 | 596.100 | 695.168 | 862.167 | 990.225 |
| x    | S* | S* | E  | D  | V  | S* | Q  | E  | E  | S  | L  | F  | L  | I  | S  | G  | K  | P  | E  | G  | R  | 201.098 | 258.120 | 387.162 | 484.215 | 612.310 | 669.331 | 756.363 |
| y    | S* | S* | E  | D  | V  | S* | Q  | E  | E  | S  | L  | F  | L  | I  | S  | G  | K  | P  | E  | G  | R  | 175.119 | 232.140 | 361.183 | 458.236 | 586.331 | 643.352 | 730.384 |
| z    | S* | S* | E  | D  | V  | S* | Q  | E  | E  | S  | L  | F  | L  | I  | S  | G  | K  | P  | E  | G  | R  | 158.092 | 215.114 | 344.156 | 441.209 | 569.304 | 626.326 | 713.358 |
| i    | S* | S* | E  | D  | V  | S* | Q  | E  | E  | S  | L  | F  | L  | I  | S  | G  | K  | P  | E  | G  | R  | 140.011 | 140.010 | 102.054 | 88.039  | 72.080  | 140.010 | 101.070 |
|      | 21 | 20 | 19 | 18 | 17 | 16 | 15 | 14 | 13 | 12 | 11 | 10 | 9  | 8  | 7  | 6  | 5  | 4  | 3  | 2  | 1  | Arg     | Gly     | Glu     | Pro     | Lys     | Gly     | Ser     |



Tree hierar Calc. MH+ Meas. Mr Calc. Mr Dev.(Da) Score MascotScoSequence

F:\Identified saliva phosphopeptides\MSMS\_2830\0\_M14\1\2830.3100.LIFT1SRefpdata\1\1r

MSMS\_2830

DHB

Basic salivary proline-rich protein 4 OS=Homo sapiens GN=PRB4 PE=1 SV=3 PRB4\_HUMAN

Digest Matches (Score: 39.53)

Search Parameter: Charge=-1+, MS Tol.:250.000000 ppm, MSMS Tol.:1.000000 Da, semiTrypsin, Mascot 2.4.1, SwissProt SwissProt\_2013\_09.fasta

Modifications: Global: Carboxymethyl (C), Optional: Oxidation (M), Phospho (ST),

MSMS 1 2830,055 2829,303 2829,047 0,255 39 39 ESSSEDSVQEEESLFLISGKPEGR 2: Phospho (ST) 3: Phospho (ST) 4: Phospho (ST) 8: Phospho (ST)

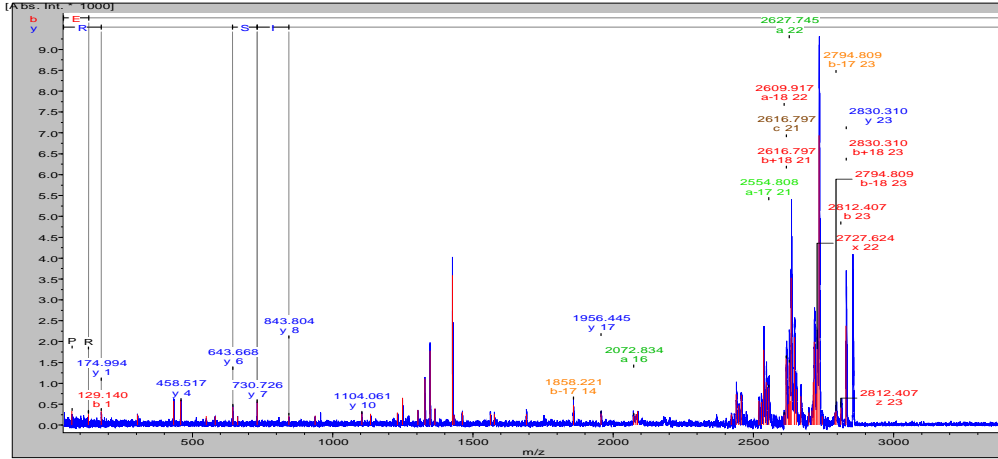

|      | E  | S  | S  | S  | E  | D  | V  | S  | Q  | E  | E  | S  | L  | F  | L  | I  | S  | G  | K  | P  | E  | G  | R  | Glu     | Ser     | Ser     | Ser     | Glu     | Asp     |
|------|----|----|----|----|----|----|----|----|----|----|----|----|----|----|----|----|----|----|----|----|----|----|----|---------|---------|---------|---------|---------|---------|
| Ion  | 1  | 2  | 3  | 4  | 5  | 6  | 7  | 8  | 9  | 10 | 11 | 12 | 13 | 14 | 15 | 16 | 17 | 18 | 19 | 20 | 21 | 22 | 23 | 1       | 2       | 3       | 4       | 5       | 6       |
| a    | E  | S  | S  | S  | E  | D  | V  | S  | Q  | E  | E  | S  | L  | F  | L  | I  | S  | G  | K  | P  | E  | G  | R  | 102.055 | 269.053 | 436.052 | 603.050 | 732.093 | 847.120 |
| a-17 | E  | S  | S  | S  | E  | D  | V  | S  | Q  | E  | E  | S  | L  | F  | L  | I  | S  | G  | K  | P  | E  | G  | R  | 85.028  | 252.027 | 419.025 | 586.023 | 715.066 | 830.093 |
| a-18 | E  | S  | S  | S  | E  | D  | V  | S  | Q  | E  | E  | S  | L  | F  | L  | I  | S  | G  | K  | P  | E  | G  | R  | 84.044  | 251.043 | 418.041 | 585.039 | 714.082 | 829.109 |
| b    | E  | S  | S  | S  | E  | D  | V  | S  | Q  | E  | E  | S  | L  | F  | L  | I  | S  | G  | K  | P  | E  | G  | R  | 130.050 | 297.048 | 464.047 | 631.045 | 760.088 | 875.114 |
| b-17 | E  | S  | S  | S  | E  | D  | V  | S  | Q  | E  | E  | S  | L  | F  | L  | I  | S  | G  | K  | P  | E  | G  | R  | 113.023 | 280.022 | 447.020 | 614.018 | 743.061 | 858.088 |
| b-18 | E  | S  | S  | S  | E  | D  | V  | S  | Q  | E  | E  | S  | L  | F  | L  | I  | S  | G  | K  | P  | E  | G  | R  | 112.039 | 279.038 | 446.036 | 613.034 | 742.077 | 857.104 |
| b+18 | E  | S  | S  | S  | E  | D  | V  | S  | Q  | E  | E  | S  | L  | F  | L  | I  | S  | G  | K  | P  | E  | G  | R  | 148.060 | 315.059 | 482.057 | 649.056 | 778.098 | 893.125 |
| c    | E  | S  | S  | S  | E  | D  | V  | S  | Q  | E  | E  | S  | L  | F  | L  | I  | S  | G  | K  | P  | E  | G  | R  | 147.076 | 314.075 | 481.073 | 648.071 | 777.114 | 892.141 |
| x    | E  | S  | S  | S  | E  | D  | V  | S  | Q  | E  | E  | S  | L  | F  | L  | I  | S  | G  | K  | P  | E  | G  | R  | 201.098 | 258.120 | 387.162 | 484.215 | 612.310 | 669.331 |
| y    | E  | S  | S  | S  | E  | D  | V  | S  | Q  | E  | E  | S  | L  | F  | L  | I  | S  | G  | K  | P  | E  | G  | R  | 175.119 | 232.140 | 361.183 | 458.236 | 586.331 | 643.352 |
| z    | E  | S  | S  | S  | E  | D  | V  | S  | Q  | E  | E  | S  | L  | F  | L  | I  | S  | G  | K  | P  | E  | G  | R  | 158.092 | 215.114 | 344.156 | 441.209 | 569.304 | 626.326 |
| i    | E  | S  | S  | S  | E  | D  | V  | S  | Q  | E  | E  | S  | L  | F  | L  | I  | S  | G  | K  | P  | E  | G  | R  | 102.055 | 140.010 | 140.010 | 140.010 | 102.054 | 88.039  |
|      | 23 | 22 | 21 | 20 | 19 | 18 | 17 | 16 | 15 | 14 | 13 | 12 | 11 | 10 | 9  | 8  | 7  | 6  | 5  | 4  | 3  | 2  | 1  | Arg     | Gly     | Glu     | Pro     | Lys     | Gly     |

Tree hierar Calc. MH+ Meas. Mr Calc. Mr Dev.(Da) Score MascotScc Sequence

F:\Identified saliva phosphopeptides\3521.7100.LIFT1SRRefpdata\111r

Lift3521

Lift3521

Salivary acidic proline-rich phosphoprotein 1/2 OS=Homo sapiens GN=PRH1 PE=1 SV=2 PRPC\_HUMAN

Digest Matches (Score: 89.85)

Search Parameter: Charge=1+, MS Tol.:250.000000 ppm, MSMS Tol.:1.000000 Da, semiTrypsin, Mascot 2.4.1, SwissProt SwissProt\_2013\_09.fasta

Modifications: Global: Carboxymethyl (C), Optional: Oxidation (M), Phospho (ST)

Unknown: Gln->pyro-Glu (N-term Q), Gln->pyro-Glu (N-term Q), Gln->pyro-Glu (N-term Q), ? (Pls. Synchronize SE and Mascot mod. definitions and reimport result)

MSMS 1 3521,404 3520,703 3520,397 0,306 17 89 QDLDEVDVLSIDGGDSEQFIDEER N-Term: Gln->pyro-Glu (N-term Q) 8: Phospho (ST) 22: Phospho (ST)

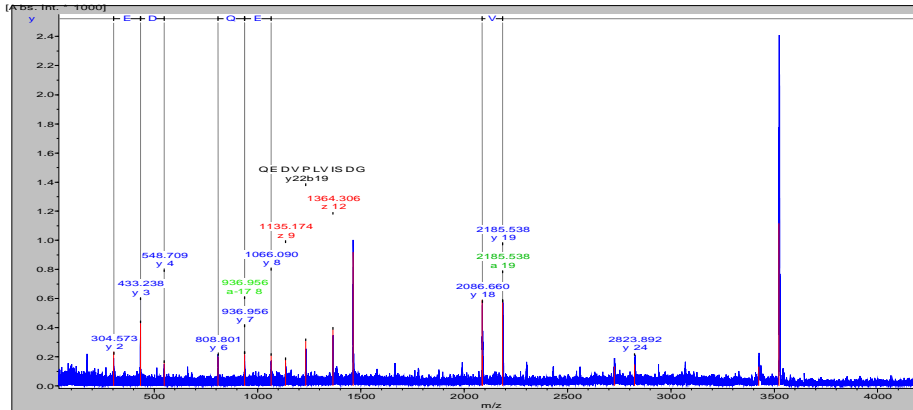

|      | Q  | D  | L  | D  | E  | D  | V  | S  | Q  | E  | D  | V  | P  | L  | V  | I  | S  | D  | G  | G  | D  | S  | E  | Q  | F  | I  | D  | E  | E  | R  | Gln     | Asp     | Leu     | Asp     |
|------|----|----|----|----|----|----|----|----|----|----|----|----|----|----|----|----|----|----|----|----|----|----|----|----|----|----|----|----|----|----|---------|---------|---------|---------|
| Ion  | 1  | 2  | 3  | 4  | 5  | 6  | 7  | 8  | 9  | 10 | 11 | 12 | 13 | 14 | 15 | 16 | 17 | 18 | 19 | 20 | 21 | 22 | 23 | 24 | 25 | 26 | 27 | 28 | 29 | 30 | 1       | 2       | 3       | 4       |
| a    | Q  | D  | L  | D  | E  | D  | V  | S* | Q  | E  | D  | V  | P  | L  | V  | I  | S* | D  | G  | G  | D  | S  | E  | Q  | F  | I  | D  | E  | E  | R  | 100.063 | 215.090 | 328.174 | 443.201 |
| a-17 | Q  | D  | L  | D  | E  | D  | V  | S* | Q  | E  | D  | V  | P  | L  | V  | I  | S* | D  | G  | G  | D  | S  | E  | Q  | F  | I  | D  | E  | E  | R  | 83.037  | 198.064 | 311.148 | 426.175 |
| a-18 | Q  | D  | L  | D  | E  | D  | V  | S* | Q  | E  | D  | V  | P  | L  | V  | I  | S* | D  | G  | G  | D  | S  | E  | Q  | F  | I  | D  | E  | E  | R  | 82.053  | 197.079 | 310.164 | 425.190 |
| b    | Q  | D  | L  | D  | E  | D  | V  | S* | Q  | E  | D  | V  | P  | L  | V  | I  | S* | D  | G  | G  | D  | S  | E  | Q  | F  | I  | D  | E  | E  | R  | 128.058 | 243.085 | 356.169 | 471.196 |
| b-17 | Q  | D  | L  | D  | E  | D  | V  | S* | Q  | E  | D  | V  | P  | L  | V  | I  | S* | D  | G  | G  | D  | S  | E  | Q  | F  | I  | D  | E  | E  | R  | 111.031 | 226.058 | 339.142 | 454.169 |
| b-18 | Q  | D  | L  | D  | E  | D  | V  | S* | Q  | E  | D  | V  | P  | L  | V  | I  | S* | D  | G  | G  | D  | S  | E  | Q  | F  | I  | D  | E  | E  | R  | 110.047 | 225.074 | 338.158 | 453.185 |
| b+18 | Q  | D  | L  | D  | E  | D  | V  | S* | Q  | E  | D  | V  | P  | L  | V  | I  | S* | D  | G  | G  | D  | S  | E  | Q  | F  | I  | D  | E  | E  | R  | 146.069 | 261.096 | 374.180 | 489.207 |
| c    | Q  | D  | L  | D  | E  | D  | V  | S* | Q  | E  | D  | V  | P  | L  | V  | I  | S* | D  | G  | G  | D  | S  | E  | Q  | F  | I  | D  | E  | E  | R  | 145.085 | 260.112 | 373.196 | 488.223 |
| x    | Q  | D  | L  | D  | E  | D  | V  | S* | Q  | E  | D  | V  | P  | L  | V  | I  | S* | D  | G  | G  | D  | S  | E  | Q  | F  | I  | D  | E  | E  | R  | 201.098 | 330.141 | 459.183 | 574.210 |
| y    | Q  | D  | L  | D  | E  | D  | V  | S* | Q  | E  | D  | V  | P  | L  | V  | I  | S* | D  | G  | G  | D  | S  | E  | Q  | F  | I  | D  | E  | E  | R  | 175.119 | 304.162 | 433.204 | 548.231 |
| z    | Q  | D  | L  | D  | E  | D  | V  | S* | Q  | E  | D  | V  | P  | L  | V  | I  | S* | D  | G  | G  | D  | S  | E  | Q  | F  | I  | D  | E  | E  | R  | 158.092 | 287.135 | 416.178 | 531.205 |
| i    | Q  | D  | L  | D  | E  | D  | V  | S* | Q  | E  | D  | V  | P  | L  | V  | I  | S* | D  | G  | G  | D  | S  | E  | Q  | F  | I  | D  | E  | E  | R  | 100.063 | 88.039  | 86.096  | 88.039  |
|      | 30 | 29 | 28 | 27 | 26 | 25 | 24 | 23 | 22 | 21 | 20 | 19 | 18 | 17 | 16 | 15 | 14 | 13 | 12 | 11 | 10 | 9  | 8  | 7  | 6  | 5  | 4  | 3  | 2  | 1  | Arg     | Glu     | Glu     | Asp     |
